# Supplementary material
Source: publisher figshare collection journal article supplement (https://sage.figshare.com/ndownloader/files/15254096)
Supplement: Supplementary file 1 [file 15254096]

## **Supplementary Information**

**Radotinib inhibits mitosis entry in acute myeloid leukemia cells via suppression of AURKA expression**

Sook-Kyoung Heo, Eui-Kyu Noh, Yookyung Jeong, Lan Jeong Ju, Jun Young Sung, Ho-Min Yu, Jaekyung Cheon, SuJin Koh, Young Joo Min, Yunsuk Choi, Jae-Cheol Jo

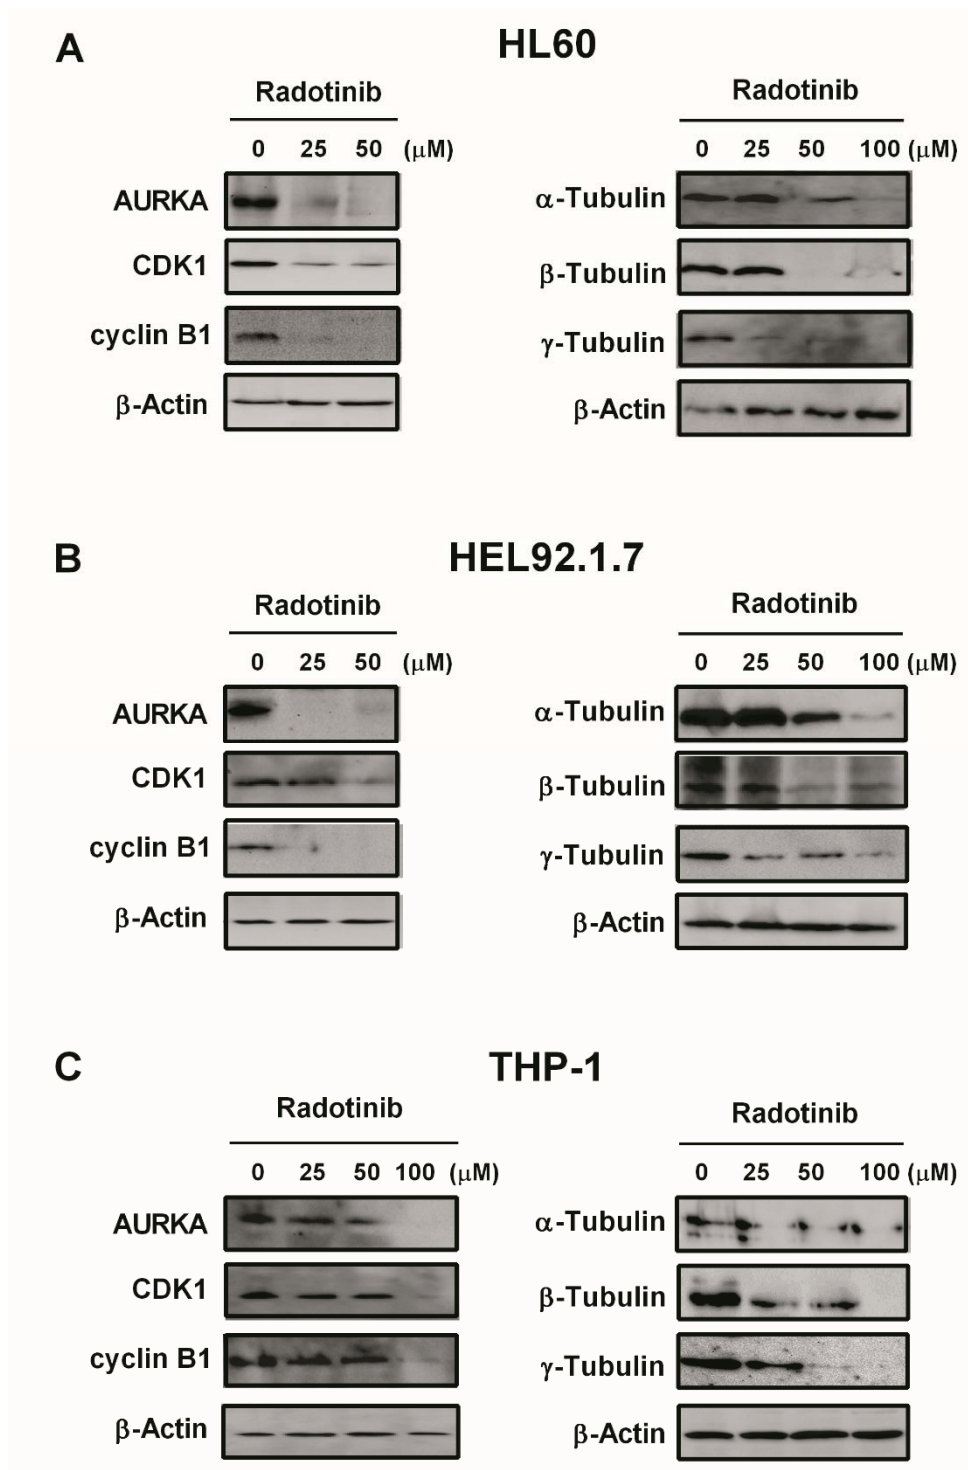

**Supplementary Fig. 1.** Radotinib inhibits the expression of AURKA, CDK1, cyclin B1,  $\alpha$ -,  $\beta$ -, and  $\gamma$ -tubulin in various AML cell lines. (A) HL60. (B) HEL92.1.7. (C) THP-1.  $\beta$ -Actin was used to confirm equal loading. Results are representative of three independent experiments.
